# Supplementary material for: Enhancing the Photocatalytic Performance of Antibiotics Using a Z-Scheme Heterojunction of 0D ZnIn2S4 Quantum Dots and 3D Hierarchical Inverse Opal TiO2
Source: MDPI journal article supplement (doi:10.3390/molecules28207174), 2023-10-19
Supplement: s1 [file s1]

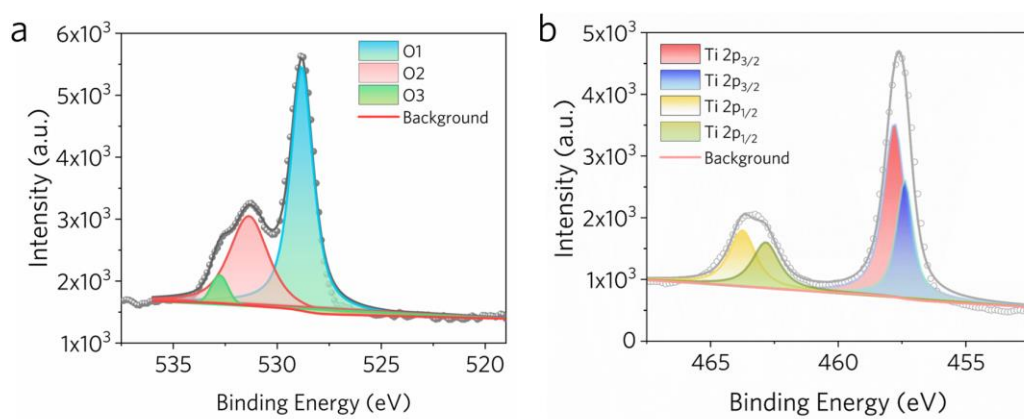

**Figure S1.** X-ray photoelectron spectroscopy of O1s and Ti 2p.

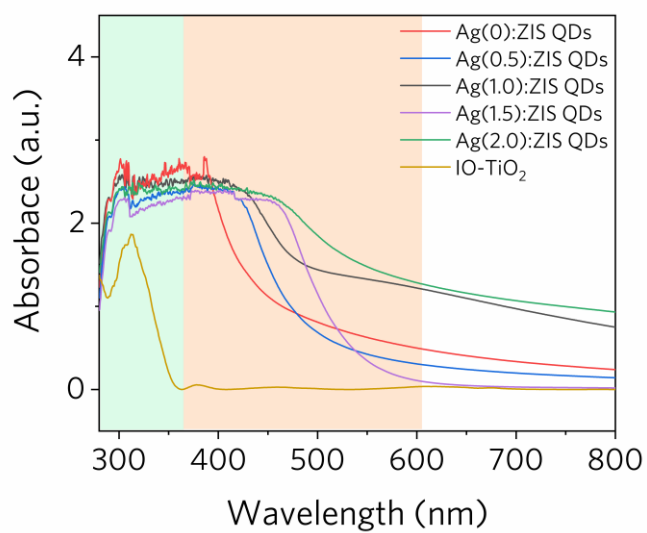

**Figure S2.** UV-Vis spectra of IO-TiO<sub>2</sub> and various Ag contents of ZnIn<sub>2</sub>S<sub>4</sub> QDs.

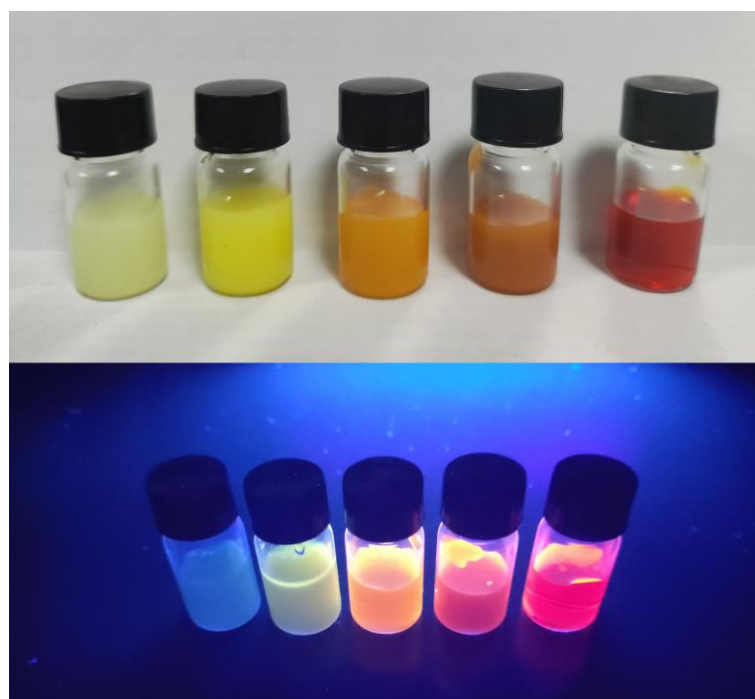

**Figure S3.** Digital photograph of various Ag contents of ZnIn<sub>2</sub>S<sub>4</sub> QDs under light ( ultraviolet light).

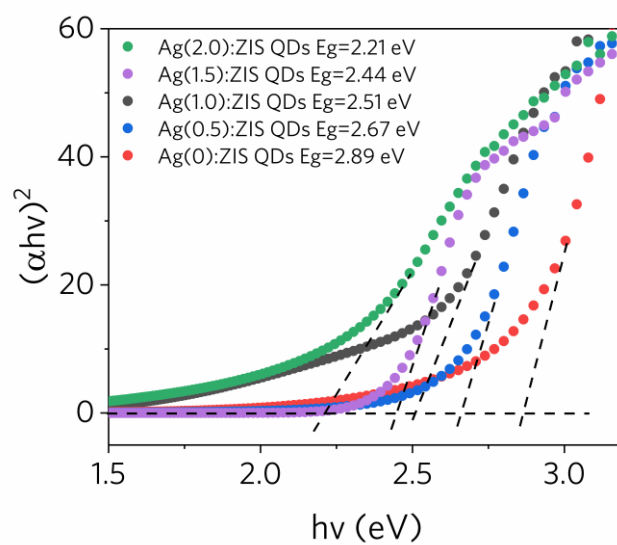

**Figure S4.** Tauc plots of Ag(X=0, 0.5, 1.0, 1.5, 2.0): ZIS QDs.

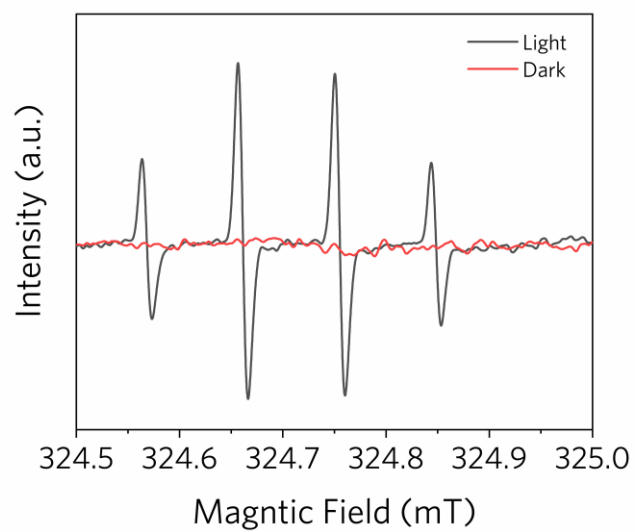

**Figure S5.** EPR spectra of DMPO-OH.

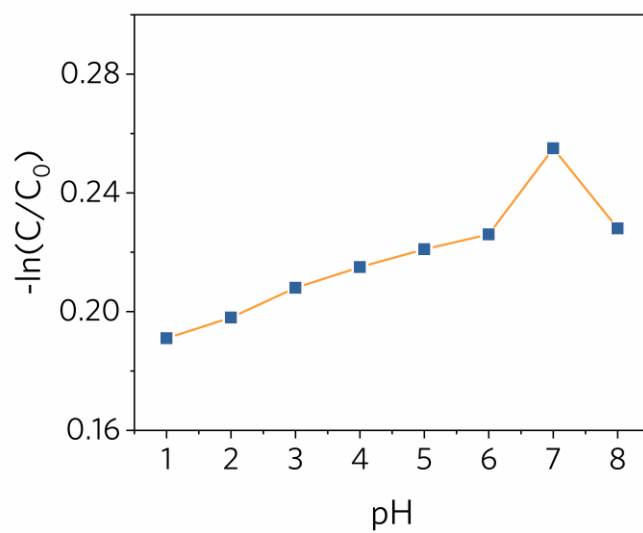

**Figure S6.** Optimization of pH for TC photodegradation experiment.

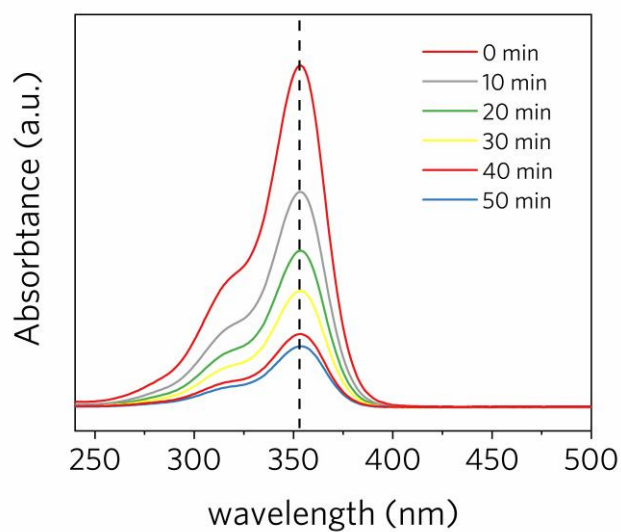

**Figure S7.** UV-Vis spectra of tetracycline (TC) aqueous solution in the presence of Ag(2): ZIS QDs/IO-TiO<sub>2</sub> heterojunction under visible light irradiation.

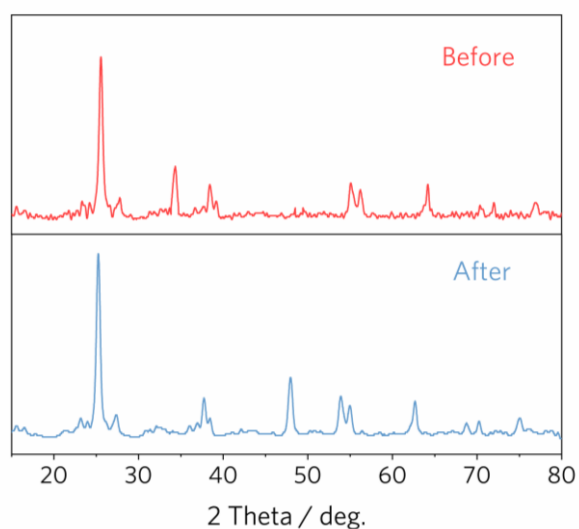

**Figure S8.** XRD of the catalyst before and after 4th recycle run.

**Table S1.** Electrolyte resistance ( $R_s$ ), charge transfer resistance ( $R_{CT}$ ), and double-layer capacitance values ( $C_{DL}$ ) of Ag (X): ZIS QDs/IO-TiO<sub>2</sub>.

|                                       | $R_s$ | $R_{CT}$ | $C_{DL}$ |
|---------------------------------------|-------|----------|----------|
| Ag (0): ZIS QDs/IO-TiO <sub>2</sub>   | 9.4   | 107.2    | 1.79     |
| Ag (0.5): ZIS QDs/IO-TiO <sub>2</sub> | 10.4  | 67.5     | 1.13     |
| Ag (1.0): ZIS QDs/IO-TiO <sub>2</sub> | 10.6  | 59.6     | 0.99     |
| Ag (1.5): ZIS QDs/IO-TiO <sub>2</sub> | 11.4  | 58.3     | 0.97     |
| Ag (2.0): ZIS QDs/IO-TiO <sub>2</sub> | 15.6  | 7.6      | 0.13     |
